# Supplementary material for: 3D printable composite dough for stretchable, ultrasensitive and body-patchable strain sensors
Source: Royal Society of Chemistry journal article supplement (doi:10.1039/c7nr01865g), 2017-01-01
Supplement: c7nr01865g3.pdf [file c7nr01865g3.pdf]

## Supplementary Information

# 3D Printable Composite Dough for Stretchable, Ultrasensitive and Body-Patchable Strain Sensors

Ju Young Kim,<sup>a,b</sup> Seulgi Ji,<sup>a</sup> Sungmook Jung,<sup>a</sup> Beyong-Hwan Ryu,<sup>a</sup> Hyun-Suk Kim,<sup>b</sup> Sun  
Sook Lee,<sup>a</sup> Youngmin Choi,<sup>a,\*</sup> Sunho Jeong<sup>a,\*</sup>

<sup>a</sup>Division of Advanced Materials, Korea Research Institute of Chemical Technology  
(KRICT), 19 Sinseongno, Yuseong-gu, Daejeon 305-600, Korea. E-mail:  
youngmin@kRICT.re.kr; sjeong@kRICT.re.kr

<sup>b</sup>Department of Materials Science and Engineering, College of Engineering, Chungnam  
National University, 99 Daehak-ro, Yuseong-gu, Daejeon 305-764, Korea.

**KEYWORDS:** 3D, three dimensional, stretchable, sensitive, sensor

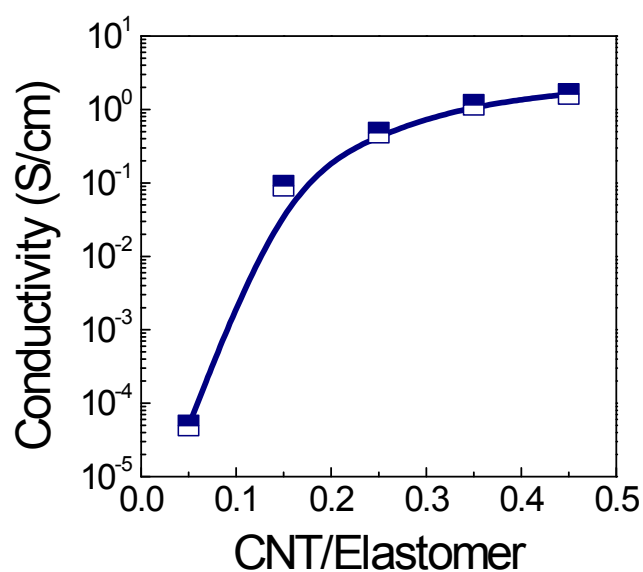

**Figure S1.** The evolution of the conductivity of line patterns printed with doughs containing GO-free composites, for MWNT/SIS ratios of 0.05, 0.15, 0.25, 0.35 and 0.45.

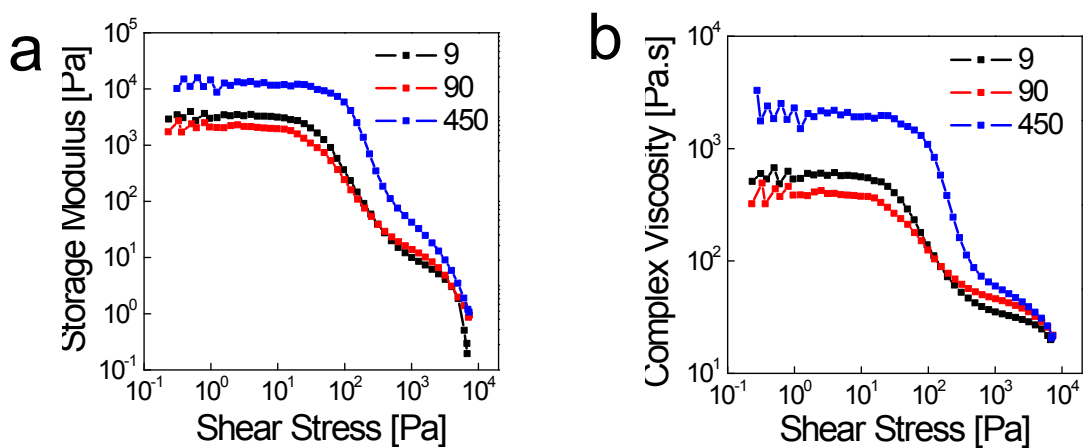

**Figure S2.** The rheological properties of (a) storage modulus and (b) complex viscosity of doughs containing  $\text{NH}_2$ -MWNT/RGO composites, with  $\text{NH}_2$ -MWNT/GO ratios of 9, 90 and 450. The ratio of composite/SIS was kept at 0.45.

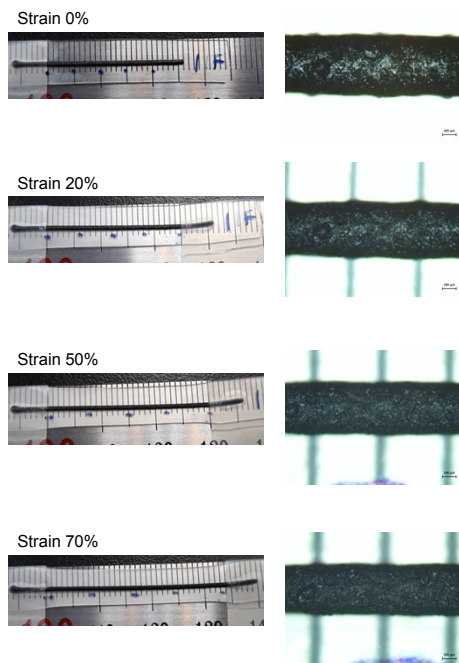

**Figure S3.** Optical microscopy images for line patterns prepared from dough samples containing  $\text{NH}_2\text{-MWNT/RGO}$  composites, with  $\text{NH}_2\text{-MWNT/GO}$  ratios of 9, as a function of an applied strain. The ratio of composite/SIS was kept at 0.45.

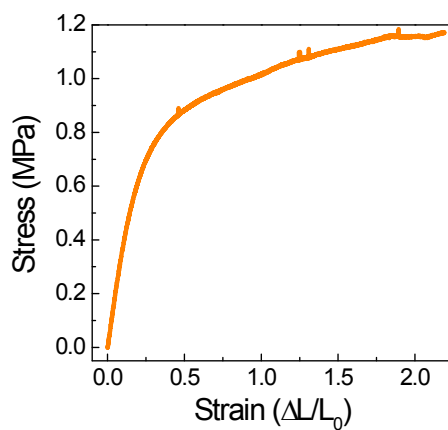

**Figure S4.** The stress-strain curve of bare SIS film.

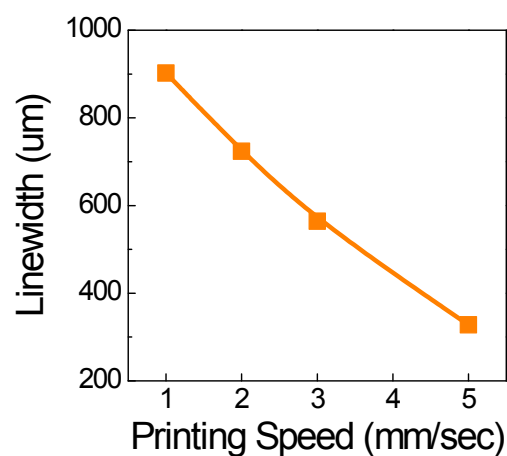

**Figure S5.** The variation in linewidth for patterns printed with various printing speeds from 1 to 5 mm/sec.

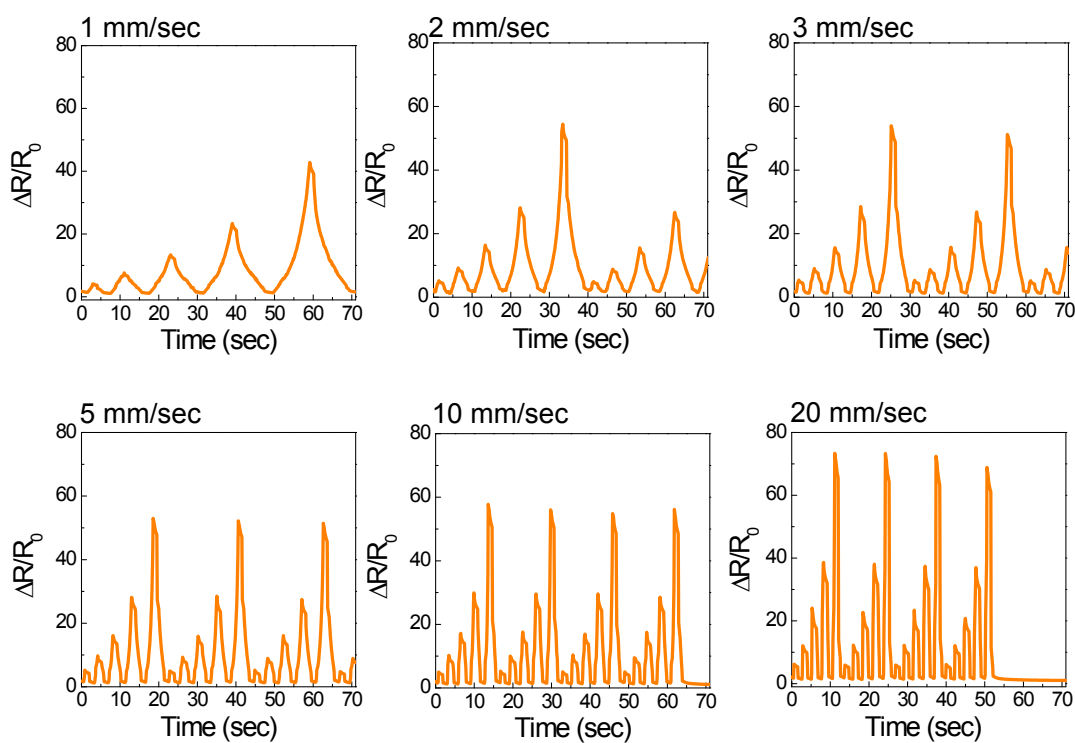

**Figure S6.** The time dependent  $\Delta R/R_0$  responses under subsequent stretching/releasing tests at strains of 10, 20, 30, 40 and 50% at strain rates of 1, 2, 3, 5, 10 and 20 mm/sec. All of the strain sensor devices were fabricated by a single printing with a printing speed of 1 mm/sec.

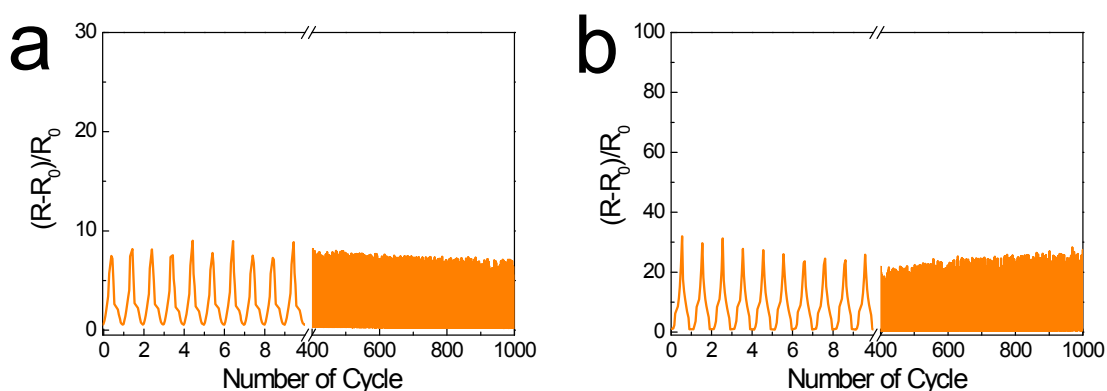

**Figure S7.** The  $\Delta R/R_0$  responses under subsequent stretching/releasing tests at strains of (a) 30 % (at a strain rate of 5 mm/sec) and (b) 50% (at a strain rate of 10 mm/sec). All of the strain sensor devices were fabricated by a single printing with a printing speed of 1 mm/sec.

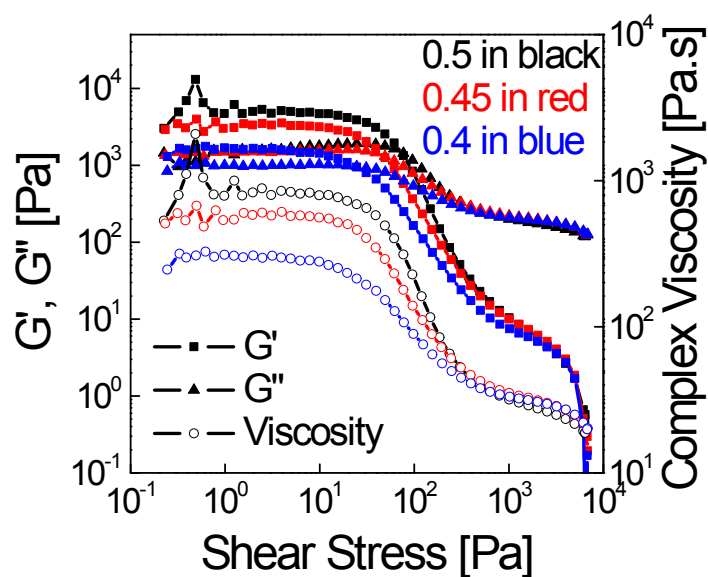

**Figure S8.** Rheological properties of doughs with different composite/SIS ratios of 0.4, 0.45 and 0.5. The  $\text{NH}_2\text{-MWNT/GO}$  ratio was kept at 9.

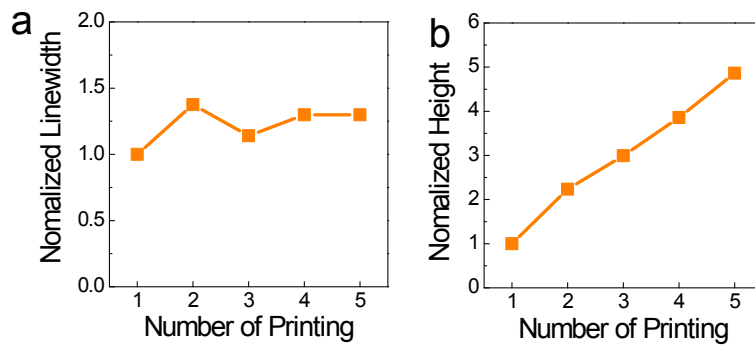

**Figure S9.** The variation in the normalized (a) linewidth and (b) height of printed patterns depending on the number of printing steps. The printing speed was 5 mm/sec.

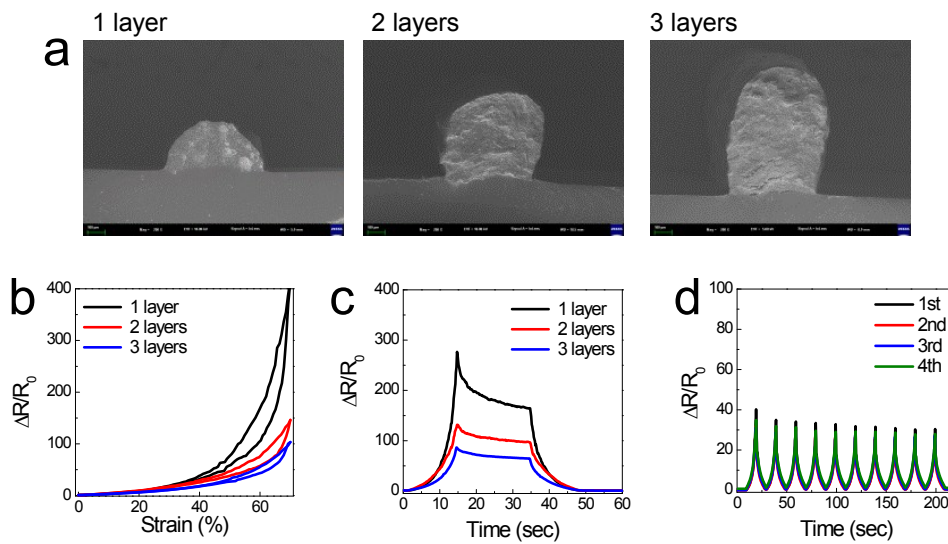

**Figure S10.** (a) Cross-sectional SEM images of patterns formed by 1-, 2- and 3-layer multiple printing processes. (b) The strain dependent and (c) time dependent  $\Delta R/R_0$  responses as a function of the number of printed layers. The time-dependent measurements were carried out with stretching up to a strain of 70%, holding for 20 sec, and releasing to the original dimension. (d) The time dependent  $\Delta R/R_0$  responses for 4 times-repeated stretching/releasing tests at a strain of 50%. All strain sensor devices were fabricated with a printing speed of 3 mm/sec and measured with a strain rate of 1 mm/sec.

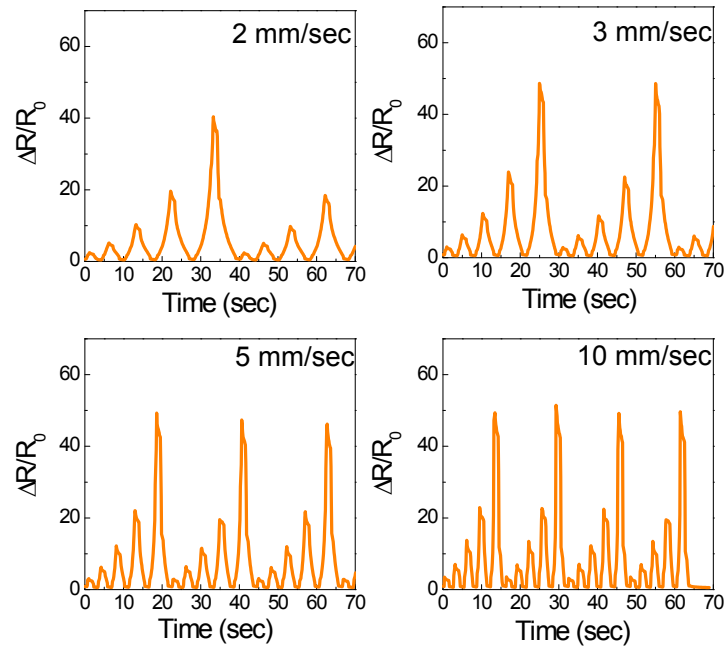

**Figure S11.** The time dependent  $\Delta R/R_0$  responses for subsequent stretching/releasing tests at strains of 10, 20, 30, 40 and 50%. The strain rates were varied from 2 to 10 mm/sec. The strain sensor devices were fabricated by 5 times-multiple printing process with a printing speed of 5 mm/sec.

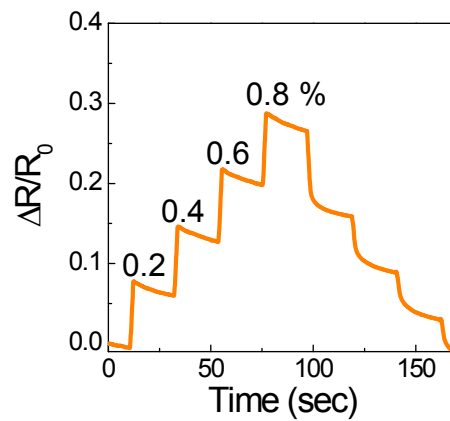

**Figure S12.** The time dependent  $\Delta R/R_0$  responses while applying a forward/reverse sequence of strains from 0 to 0.8%.

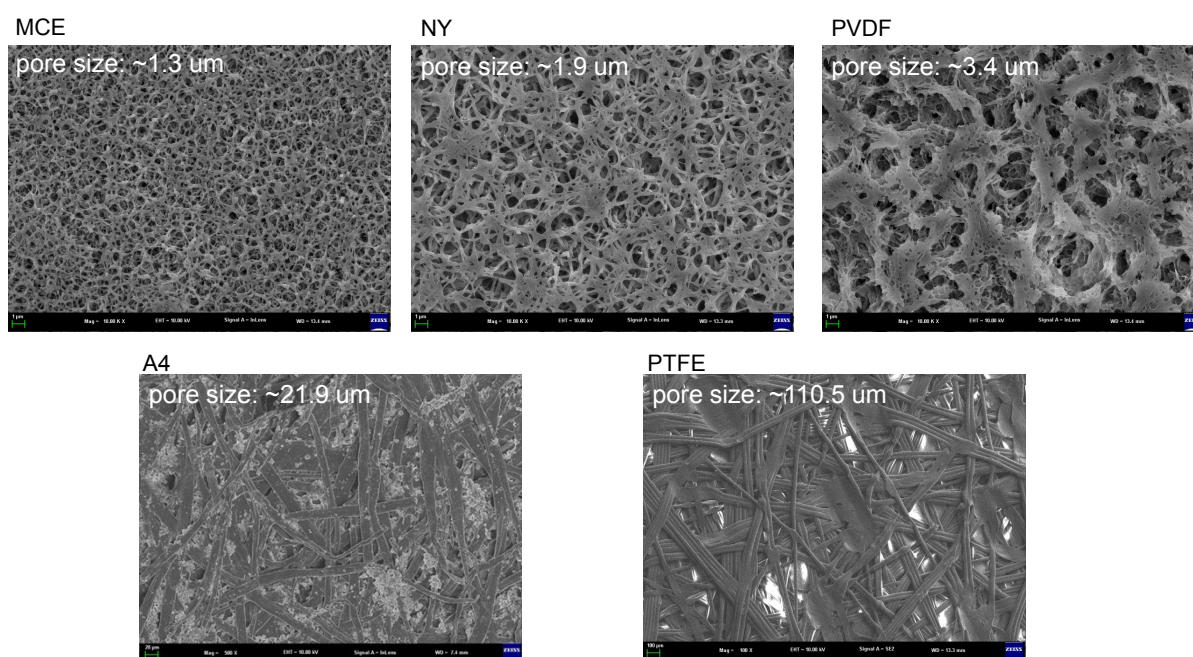

**Figure S13.** Top-view SEM images of various paper substrates.

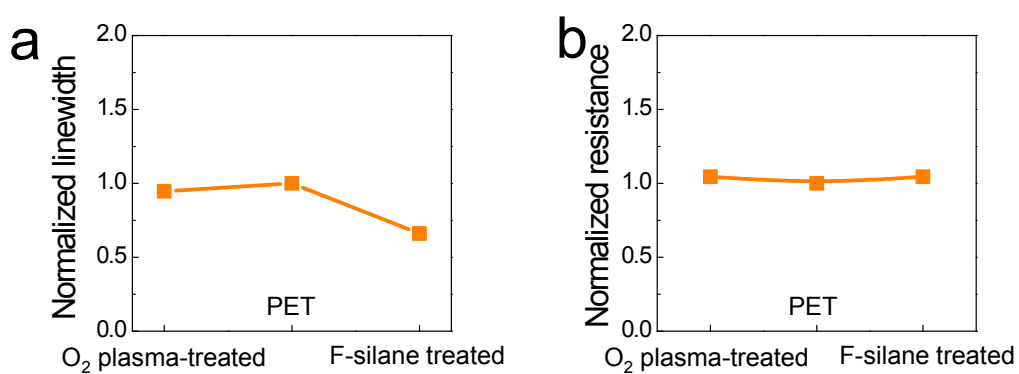

**Figure S14.** The variation in normalized linewidth and resistance for patterns printed on oxygen plasma-treated glass substrate, PET substrate and F-silane treated Si wafer substrate. F-silane stands for (tridecafluoro-1,1,2,2-tetrahydrooctyl)trichlorosilane.



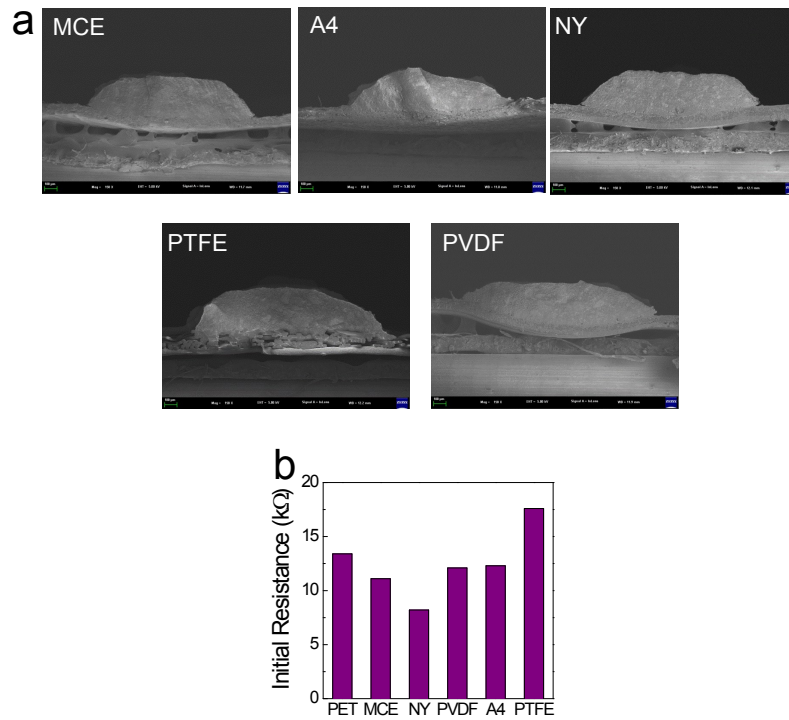

**Figure S15.** (a) Cross-sectional SEM images and (b) resistances for strain sensor layers printed on paper substrates.

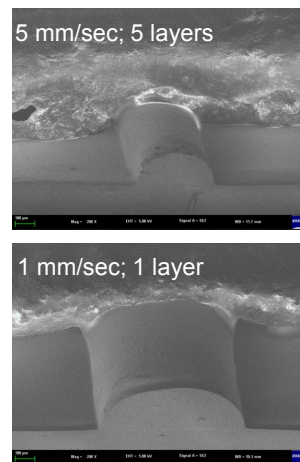

**Figure S16.** SEM images of strain sensor devices fabricated on uneven SIS substrates. The upper device was 5-times multiple-printed with a printing speed of 5 mm/sec and the lower device was single-printed with a printing speed of 1 mm/sec.

**Movie S1.** Video file showing the stable operation of strain sensor device employing active layer 5-time printed with a printing speed of 5 mm/sec.

**Movie S2.** Video file showing the stable operation of strain sensor device loaded on the robot finger.
